# Supplementary material
Source: PubMed Central journal article supplement (PMC6439819)

## Supplementary Online Content

Gutierrez-Galve L, Stein A, Hanington L, Heron J, Lewis G, O'Farrelly C, Ramchandani PG. Association of maternal and paternal depression in the postnatal period with offspring depression at age 18 years. *JAMA Psychiatry*. Published online December 26, 2018. doi:10.1001/jamapsychiatry.2018.3667

**eTable.** Bivariate Pearson correlations among paternal depression at 8 weeks and 8 months, maternal depression at 8 weeks and 8 months, couple conflict, paternal involvement, child outcomes at 42 months and offspring depression at 18 years.

**eFigure 1.** Hypothesized pathways in the association between paternal depression symptoms at 8 weeks after the birth of the child and offspring depression symptoms at 18 years in females. Model adjusted for paternal education and age.

**eFigure 2.** Hypothesized pathways in the association between maternal depression symptoms at 8 weeks after the birth of the child and offspring depression symptoms at 18 years. Model adjusted for maternal education and age.

This supplementary material has been provided by the authors to give readers additional information about their work.

**eTable.** Bivariate Pearson correlations among paternal depression at 8 weeks and 8 months, maternal depression at 8 weeks and 8 months, couple conflict, paternal involvement, child outcomes at 42 months and offspring depression at 18 years.

| <b>Variable</b><br>(Pearson correlation) | <b>1</b> | <b>2</b> | <b>3</b> | <b>4</b> | <b>5</b> | <b>6</b> | <b>7</b> | <b>8</b> | <b>9</b> | <b>10</b> |
|------------------------------------------|----------|----------|----------|----------|----------|----------|----------|----------|----------|-----------|
| <b>1 Paternal depression 8 weeks</b>     |          |          |          |          |          |          |          |          |          |           |
| <b>2 Paternal depression 8 months</b>    | 0.60**   |          |          |          |          |          |          |          |          |           |
| <b>3 Maternal depression 8 weeks</b>     | 0.27**   | 0.22**   |          |          |          |          |          |          |          |           |
| <b>4 Maternal depression 8 months</b>    | 0.21**   | 0.28**   | 0.61**   |          |          |          |          |          |          |           |
| <b>5 Couple conflict</b>                 | 0.23**   | 0.26**   | 0.34**   | 0.41**   |          |          |          |          |          |           |
| <b>6 Paternal involvement</b>            | -0.10**  | -0.09**  | -0.09**  | -0.11**  | -0.29**  |          |          |          |          |           |
| <b>7 Emotional</b>                       | 0.07**   | 0.07**   | 0.19**   | 0.18**   | 0.13**   | -0.04**  |          |          |          |           |
| <b>8 Conduct</b>                         | 0.08**   | 0.07**   | 0.18**   | 0.17**   | 0.19**   | -0.09**  | 0.25**   |          |          |           |
| <b>9 Hyperactivity</b>                   | 0.07**   | 0.06**   | 0.15**   | 0.16**   | 0.13**   | -0.06**  | 0.25**   | 0.40**   |          |           |
| <b>10 Adolescent depression</b>          | 0.05**   | 0.04*    | 0.11**   | 0.10**   | 0.07**   | -0.07**  | 0.04*    | 0.06**   | 0.03*    |           |

\*Correlation significant at 0.05

\*\*Correlation significant at 0.01

**eFigure 1.** Hypothesized pathways in the association between *paternal depression symptoms* at 8 weeks after the birth of the child and *offspring depression symptoms* at 18 years in females. Model adjusted for paternal education and age.

In the diagram, the arrows represent regressions and thus associations between variables. All regression path coefficients are standardized, so all effects sizes are directly comparable.

The figure shows regression path coefficient, standard error [SE] and p value for each direct and indirect effect.

**A.** Maternal depression was measured at 8 weeks and 8 months after birth, paternal depression and couple conflict were measured at 8 months after birth and paternal involvement at 18 months.

**B.** Emotional problems, conduct problems and hyperactivity were measured at age 4.

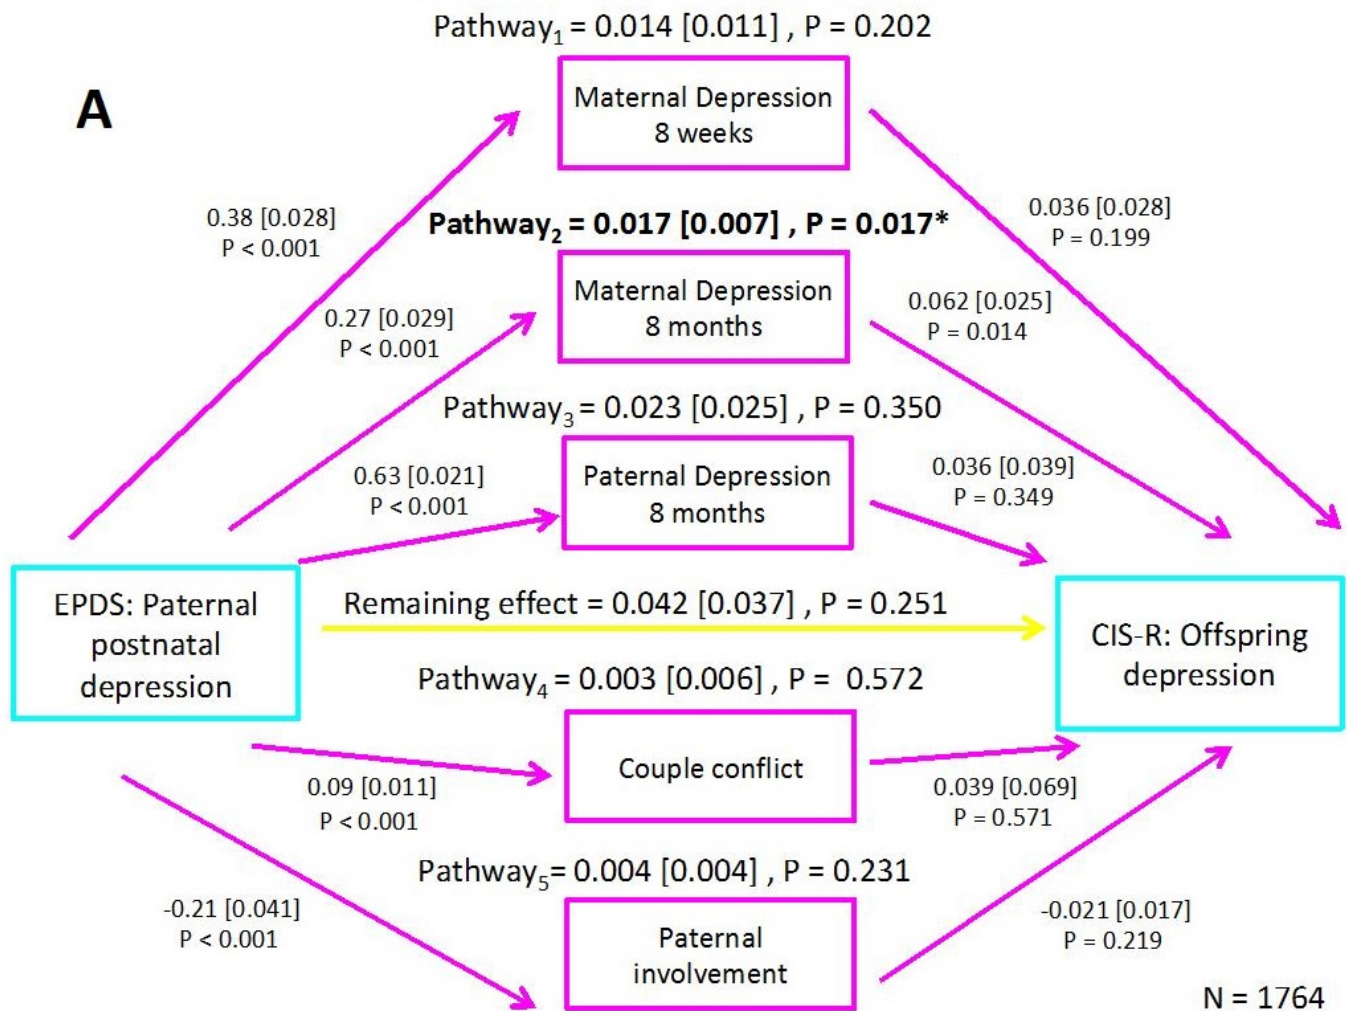

**B**

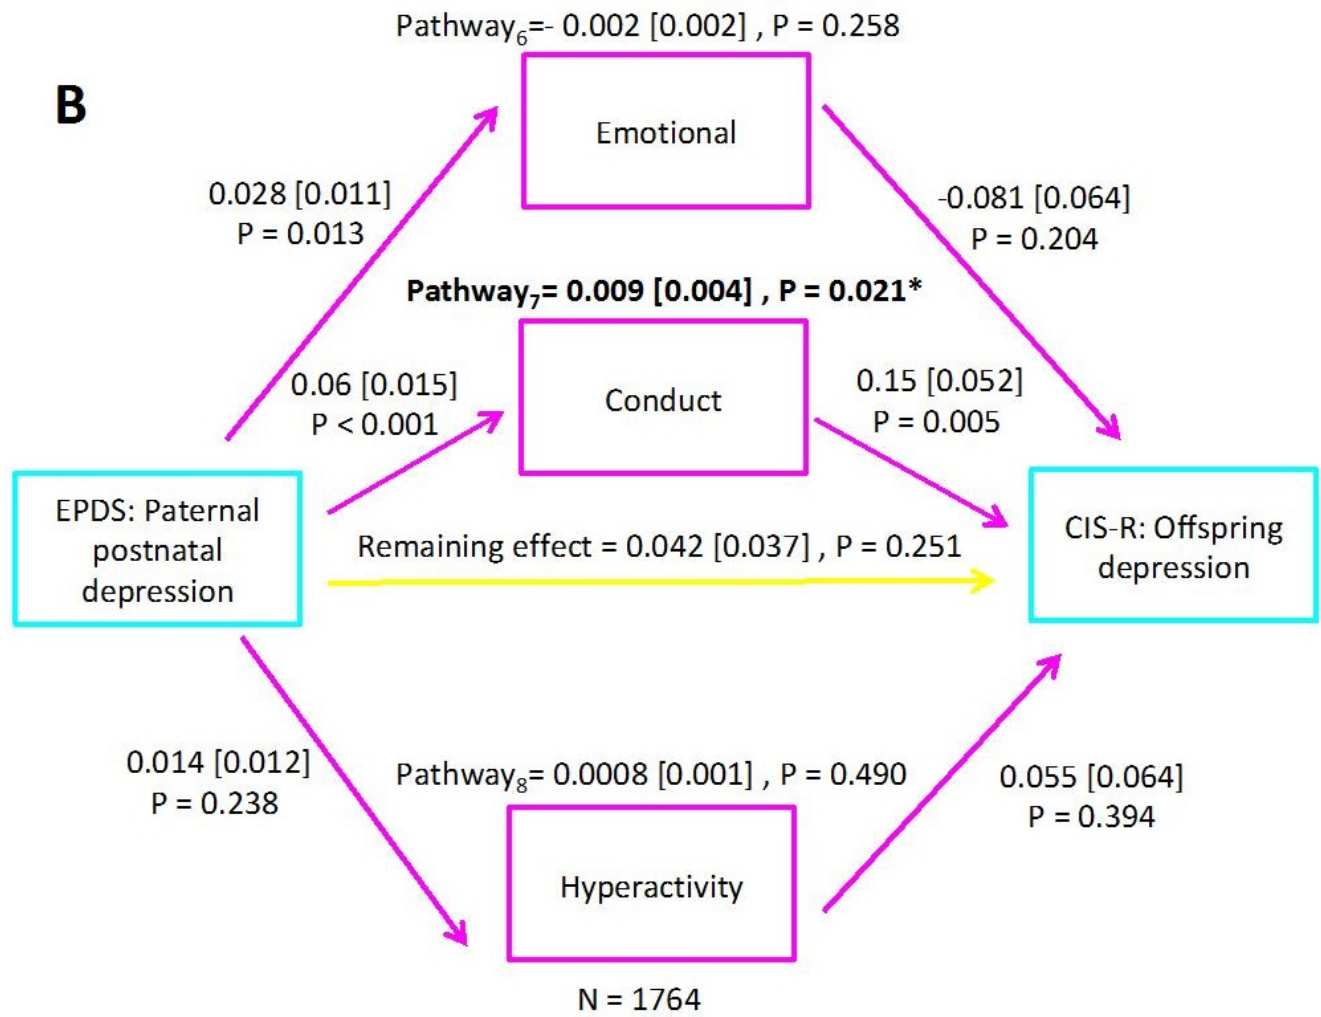

**eFigure 2.** Hypothesized pathways in the association between *maternal depression symptoms* at 8 weeks after the birth of the child and *offspring depression symptoms* at 18 years. Model adjusted for maternal education and age.

**A.** Paternal depression was measured at 8 weeks and 8 months after birth, maternal depression and couple conflict were measured at 8 months after birth and paternal involvement at 18 months.

**B.** Emotional problems, conduct problems and hyperactivity were measured at age 4.

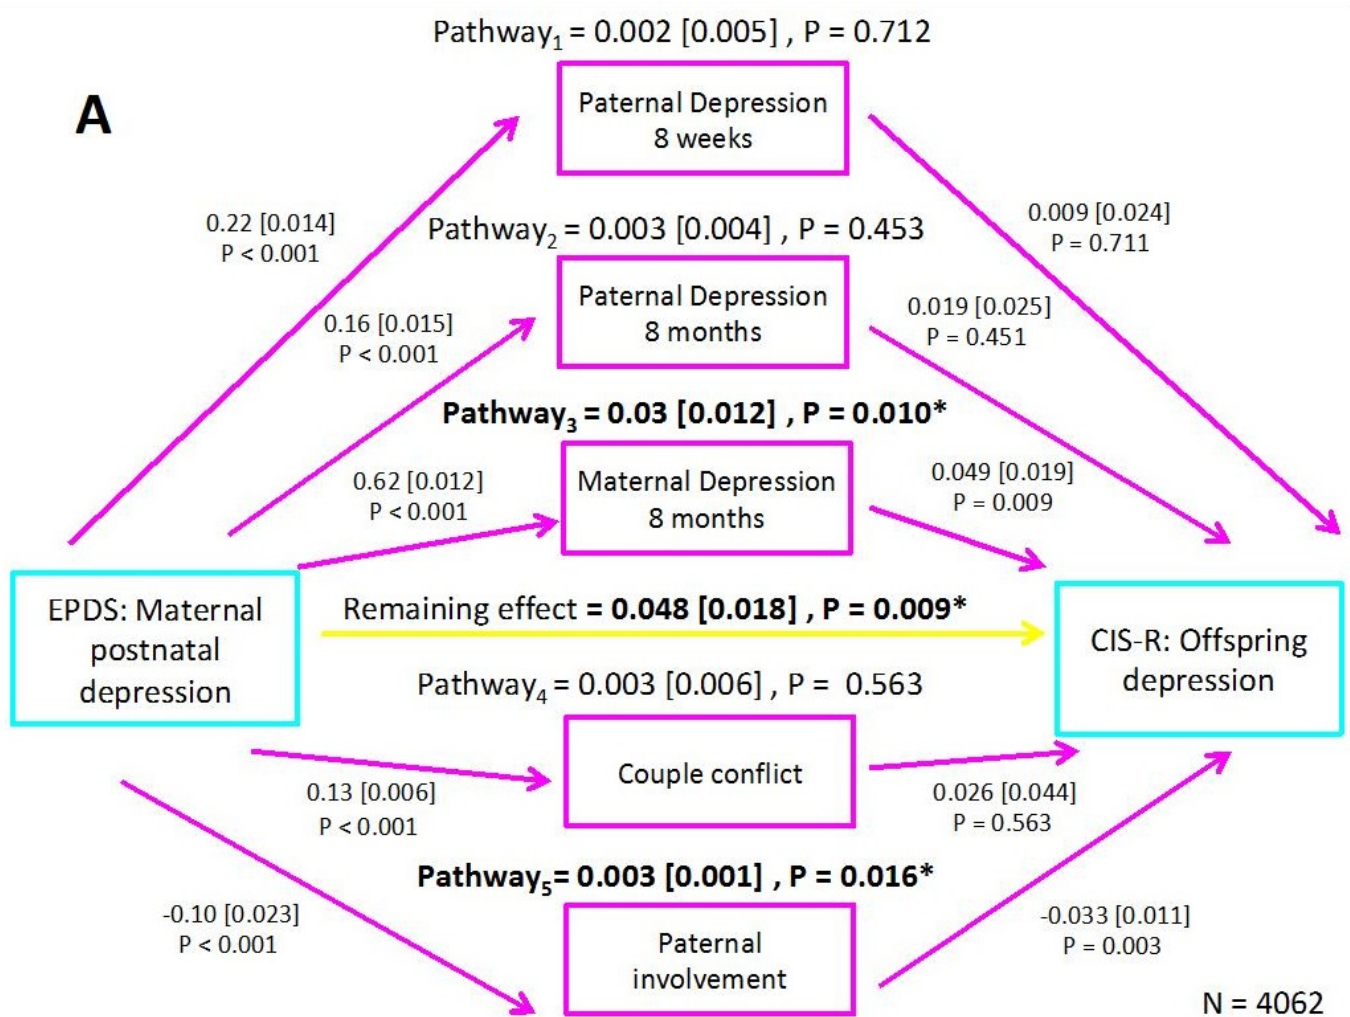

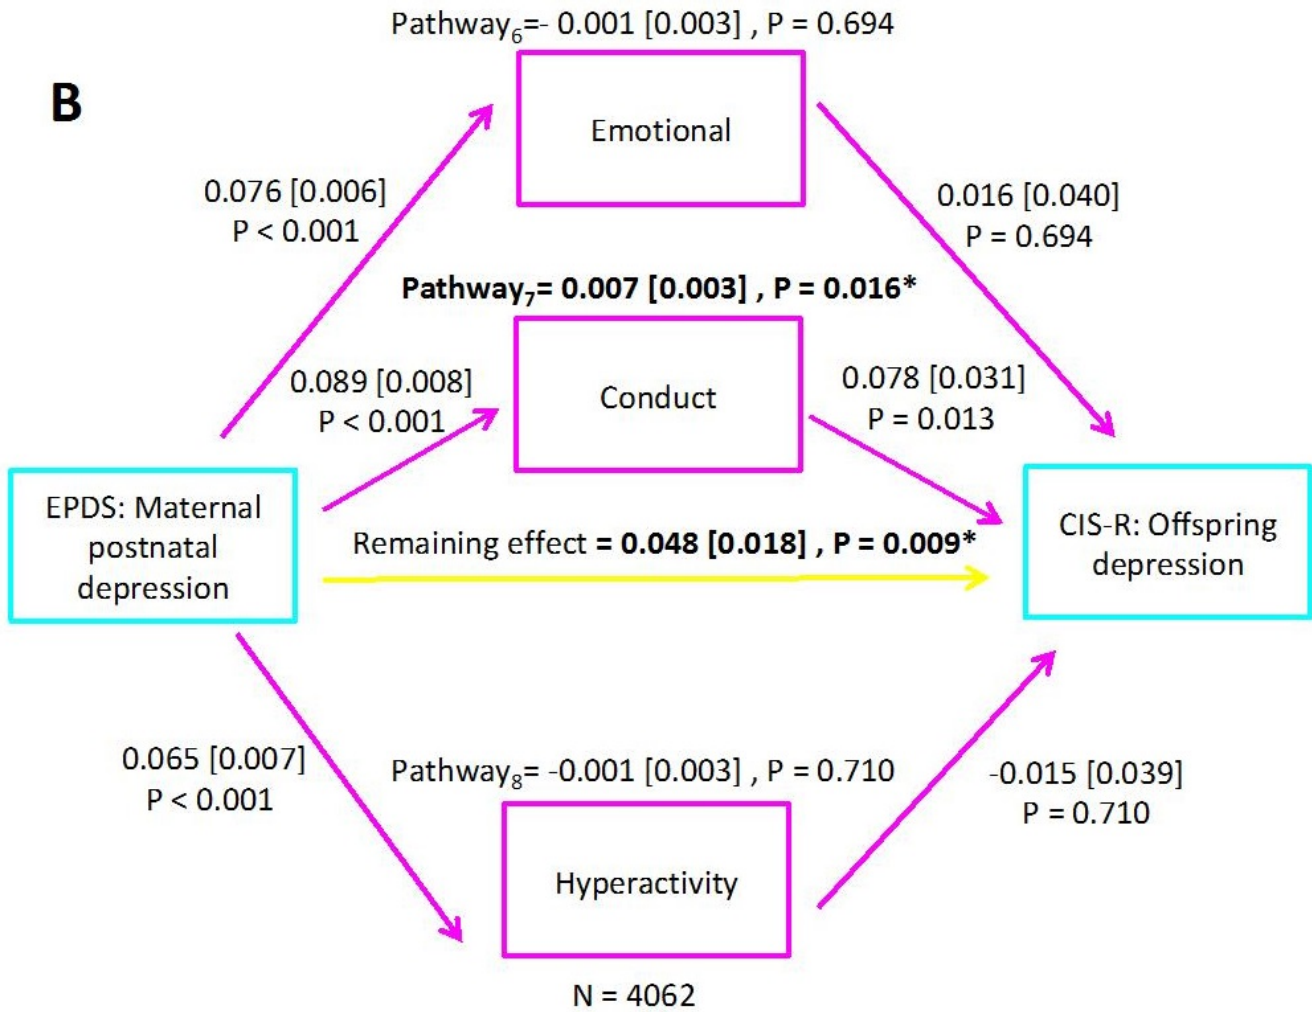

Supplement: jamapsychiatry-76-290-s001.pdf [file jamapsychiatry-76-290-s001.pdf]
